# Supplementary material for: Ethanol locks for the prevention of catheter-related infection in patients with central venous catheter: A systematic review and meta-analysis of randomized controlled trials
Source: PubMed Central journal article supplement (PMC6742384; doi:10.1371/journal.pone.0222408), 2019-09-12
Supplement: pone.0222408.s001.pdf [file pone.0222408.s001.pdf]

PubMed:

- #1 "Ethanol"[Mesh]
- #2 "Alcohols"[Mesh]
- #3 alcohols\* [Title/Abstract]
- #4 ethanol [Title/Abstract]
- #5 #1 OR #2 OR #3 OR #4
- #6 "Catheter-Related Infections"[Mesh]
- #7 "Infections"[Mesh]
- #8 "Bacteremia"[Mesh]
- #9 infection\* [Title/Abstract]
- #10 bacteremia\* [Title/Abstract]
- #11 bacteraemia\* [Title/Abstract]
- #12 CRB [Title/Abstract]
- #13 CRI [Title/Abstract]
- #14 CRBSI [Title/Abstract]
- #15 #6 OR #7 OR #8 OR #9 OR #10 OR #11 OR #12 OR #13 OR #14
- #16 lock\*[Title/Abstract]
- #17 "Randomized Controlled Trial"[Publication Type]
- #18 "Randomized Controlled Trial as Topic" [Mesh]
- #19 random\*[ Title/Abstract]
- #20 #17 OR #18 OR #19
- #21 #5 AND #15 AND #16 AND #20
